# Supplementary material for: Expression of schizophrenia biomarkers in extraocular muscles from patients with strabismus: an explanation for the link between exotropia and schizophrenia?
Source: PeerJ. 2017 Dec 22;5:e4214. doi: 10.7717/peerj.4214 (PMC5742522; doi:10.7717/peerj.4214)
Supplement: Table S3 [file peerj-05-4214-s003.xlsx]

## Sheet: Sheet1
Pairs of extraocular muscles used for PCR array experiments
Comparison type	Experiment #	Condition	Age	Sex	Muscle type
Strabismic medial rectus vs. normal medial rectus	1	Normal	6	F	RMR
		Strabismic	8	M	LMR
	2	Normal	6	F	RMR
		Strabismic	8	M	LMR
	3	Normal	6	F	RMR
		Strabismic	8	M	LMR
	4	Normal	6	F	RMR
		Strabismic	5	M	RMR
	5	Normal	17	M	RMR
		Strabismic	21	F	LMR
			14	M	LMR
	6	Normal	17	M	RMR
		Strabismic	21	F	LMR
			14	M	LMR
	7	Normal	6	F	RMR
		Strabismic	8	M	RMR
	8	Normal	17	M	RMR
		Strabismic	21	F	LMR
			14	M	LMR
	9	Normal	17	M	RMR
		Strabismic	18	F	RMR
			4	F	LMR
			20	F	LMR
			14	M	RMR
	10	Normal	17	M	RMR
		Strabismic	21	M	LMR
	11	Normal	11	M	RMR
		Strabismic	15	F	LMR
			9	M	LMR
			37	F	LMR
	12	Normal	6	F	LMR
		Strabismic	8	M	RMR
	13	Normal	17	M	LMR
		Strabismic	8	M	LMR
	14	Normal	32	M	LMR
		Strabismic	21	M	LMR
	15	Normal	38	M	LMR
		Strabismic	45	M	RMR
Strabismic lateral rectus vs. normal lateral rectus	16	Normal	38	M	LLR
		Strabismic	34	F	RLR
			19	M	RLR
			22	F	LLR
			26	F	RLR
	17	Normal	6	F	LLR
		Strabismic	8	M	LLR
			8	M	RLR
			9	F	LLR
			6	F	LLR
	18	Normal	17	M	RLR
		Strabismic	14	F	LLR
			14	F	RLR
			17	F	LLR
			17	F	RLR
	19	Normal	6	F	LLR
		Strabismic	2	F	LLR
			2	F	RLR
Normal lateral rectus vs. normal medial rectus	20	Normal	38	M	LLR
		Normal	38	M	LMR
	21	Normal	6	F	LLR
		Normal	6	F	RMR
	22	Normal	17	M	RLR
		Normal	6	F	RMR
	23	Normal	17	M	RLR
		Normal	38	M	LMR
Strabismic lateral rectus vs. strabismic medial rectus	24	Strabismic	8	M	LMR
			8	M	RMR
		Strabismic	6	F	LLR
			9	F	LLR
			8	M	LLR
	25	Strabismic	3	M	LLR
			45	M	RLR
			45	M	LLR
		Strabismic	15	F	LMR
			37	F	LMR
			9	M	LMR
	26	Strabismic	7	M	LLR
			6	M	LLR
			4	F	RLR
		Strabismic	5	F	LMR
			8	M	LMR
			2	F	LMR
	27	Strabismic	73	Unk	LLR
			80	F	LLR
		Strabismic	60	F	RMR
	28	Strabismic	53	F	LMR
			53	F	RMR
		Strabismic	69	M	LLR
			69	M	RLR
			64	M	LLR
Abbreviations: Unk, unknown; RMR, right medial rectus; LMR, left medial rectus;
RLR, right lateral rectus; LLR, left lateral rectus
