# Supplementary material for: Expression of schizophrenia biomarkers in extraocular muscles from patients with strabismus: an explanation for the link between exotropia and schizophrenia?
Source: PeerJ. 2017 Dec 22;5:e4214. doi: 10.7717/peerj.4214 (PMC5742522; doi:10.7717/peerj.4214)
Supplement: Table S5 [file peerj-05-4214-s005.xlsx]

## Sheet: Sheet1
Strabismic medial rectus (MR) vs. donor MR
Red Font	= gene has a p-value below or close to the adjusted p-value for this experiment.
	= gene is known to be expressed not only in skeletal muscle and/or tendon, but also in whole blood. We mention this out of an abundance of caution, because samples obtained from surgery tended to contain more blood than samples obtained from organ donors.
																Combined Fold-Change/donor
Gene	Exp. 1 (Cy)	Exp. 2 (Cy)	Exp. 3 (NT)	Exp. 4 (NT)	Exp. 5 (NT)	Exp. 6 (NG)	Exp. 7 (NG)	Exp. 8 (TK)	Exp. 8 (TK)	Exp. 9 (SM-Amy)	Exp. 10 (SM-Amy)	Exp. 11 (SM-Amy)	Exp. 12 (SM-Amy)	Exp. 13 (SM-And)	Exp. 14 (Custom1)		p-value
A2M															3.7032	3.7032
ABL1								11.9165	1.0149							3.4777
ABL2								1.0476	1.0379							1.0428
ACHE						0.4343	0.3908									0.412
ACTA1										1.2431	2.393	0.4106	0.6147	0.6306		0.7651	0.538575
ACTN3										0.8218	0.0714	0.7369	0.2275	0.2125		0.306	0.160052
ACVR2B										0.1847	0.864	0.2991	0.4648	0.1869		0.3509	0.004438
ADCYAP1R1			0.7724	0.2475	0.5792											0.4802	0.167184
ADIPOQ	1.4395	3.0969								9.9172	1.471	0.2929	1.6713	36.1287		2.74	0.440067
ADORA1						0.6318	0.4646									0.5418
ADORA2A						0.986	0.3157									0.5579
ADRB2										0.6104	1.3242	0.5494	0.5705	0.7795		0.7599	0.330609
AGRN										0.8373	2.5154	0.7736	0.6605	0.3674		0.8731	0.708201
AKT1										0.7279	1.4726	0.5071	0.3921	0.1903	0.4616	0.52	0.1969
AKT2										0.6355	0.9547	0.2516	0.3231	0.1904	0.4499	0.4	0.1746
ALK						2.1931	0.2745	1.3366	0.2707							0.7552	0.668924
APBB1						0.7236	0.2603									0.434
APOA1															1.7211	1.7211
APP						1.4873	0.8449									1.121
ARTN			6.5281	1.3624	1.1559	1.0601	0.5885									1.3089	0.434229
ASCL1						0.4691	0.6714									0.5612
ATP2A1										0.0628	0.194	0.0575	0.2716	0.2538		0.144	0.008312
AXL								1.9619	2.0713							2.0159
BAX			1.2413	0.5763	1.0002											0.8944	0.765378
BCL2			0.3216	0.4001	0.7097	0.7764	0.6824			0.3074	0.7662	0.2276	0.2738	0.2297		0.4181	0.075136
BDNF			0.9255	1.4379	0.764	1.1318	0.8852								0.5034	0.89	0.5304
BLK								1.057	1.2656							1.1566
BMP1	0.295	1.3946														0.6414
BMP2	0.1021	0.9682				3.9056	0.3759									0.6824	0.891018
BMP3	1.1193	8.7693														3.1329
BMP4	0.8272	0.8894				2.7941	1.1354			1.218	3.2143	0.5387	0.6567	0.3674	0.8046	1	0.9766
BMP5	0.4973	1.8614														0.9621
BMP6	0.5489	1.7366														0.9763
BMP7	1.6704	3.291														2.3446
BMP8B						0.3171	0.4421								1.1321	0.54	0.4083
BTK								1.3654	0.6346							0.9309
C3															0.1521	0.1521
CAMK2G										0.4866	1.334	0.3626	0.6554	0.8707		0.7035	0.07563
CAPN2										1.1898	1.0913	0.8791	0.8148	1.0847		1.053	0.555864
CAPN3										0.1805	1.151	0.1021	0.4299	0.4217		0.3456	0.040494
CASP3										0.6107	1.0659	0.5475	0.9421	1.7053		0.9402	0.911449
CAST										0.655	0.8928	0.594	0.5398	0.8583		0.7294	0.010131
CAV1										1.3736	1.3843	0.4594	0.804	1.4115		1.0493	0.704187
CAV3										0.096	1.2498	0.144	0.4587	0.4831		0.3453	0.034375
CBLN1			9.0762	1.1122	2.8552											3.066	0.915213
CCKAR			0.4743	3.5105	9.8812											2.5433	0.838015
CCL16															9.3337	9.3337
CDK5R1						0.5571	0.3349									0.4319
CDK5RAP2						1.3119	0.411									0.7343
CHRM2						13.6167	3.4444									6.8484
CNTF	0.1531	1.1114	0.0855	0.3855	0.3434										0.3551	0.3	0.0281
CNTFR			0.9452	0.1482	0.2408										0.3326	0.33	0.1093
CNTN1															6.4858	6.4858
CREB1						1.3039	0.9417									1.1081
CRH			6.4762	0.7489	1.7856											2.0536	0.382578
CRHBP			3.3679	2.9013	1.0448											2.1694	0.150163
CRHR1			3.8986	0.4508	0.68											1.0612	0.631193
CRHR2			0.3116	0.574	0.7024											0.5009	0.097477
CRP															4.7572	4.7572
CRYAB										0.1211	0.8152	0.0875	0.3868	0.6018		0.3036	0.011055
CS										0.1809	0.3089	0.1666	0.424	0.351		0.2818	0.000735
CSF1	0.2075	1.244														0.508
CSF1R								1.994	1.2311							1.5668
CSF2	2.498	0.6069														1.2313
CSF3	2.164	0.2922														0.7952
CSK								1.1827	1.4077							1.2903
CTGF															15.6132	15.6132
CTNNB1										1.0592	1.4071	0.7866	0.9212	0.9211		1.0501	0.974611
CX3CR1			1.0895	0.4527	0.5918											0.6633	0.379899
CXCL1						0.9909	2.2284									1.486
CXCR4			1.8178	2.3694	5.3846										3.4459	2.99	0.0399
DAG1										0.4057	1.2653	0.2547	0.7932	0.1379		0.4495	0.073724
DCX						4.7226	64.7184								5.3002	11.74	0.081
DDR1								1.1976	0.0905							0.3293
DDR2								3.5576	2.2516						1.6894	2.38	0.0944
DES										0.0986	0.7277	0.0895	0.2217	0.1078		0.1815	0.000627
DLG4						1.8063	0.7378									1.1544
DLL1						1.9293	0.5636									1.0428
DMD										0.2719	0.834	0.189	0.4057	0.2819		0.3628	0.001574
DMPK										0.3293	1.3081	0.1548	0.0939	0.1363		0.2558	0.215047
DRD2						0.5844	0.1925									0.3354
DVL3						0.9157	0.1998									0.4277
DYSF										0.1875	0.8626	0.3201	0.2536	0.3464		0.3575	0.032124
EDN1															0.7256	0.7256
EFNB1						0.3755	0.2002									0.2742
EGF						1.7506	0.9209									1.2697
EGFR								1.4084	0.7816							1.0492
EP300						0.886	0.481									0.6528
EPHA1								2.7676	1.6201							2.1175
EPHA2								0.5323	0.4388							0.4833
EPHA3								2.8946	1.2319							1.8884
EPHA4								1.7146	0.4625							0.8905
EPHA5								1.0412	6.197							2.5402
EPHA7								7.7594	1.6122							3.5369
EPHA8								0.6631	1.2656							0.9161
EPHB1								0.5078	0.3215							0.404
EPHB2								1.7772	0.6515							1.076
EPHB3								2.3288	2.857							2.5794
EPHB4								1.008	0.5217							0.7251
EPHB6								0.5167	0.7467							0.6212
ERBB2						0.8293	0.2751	1.0995	0.3433						0.2198	0.58	0.1637
ERBB3								0.602	0.322							0.4403
ERBB4								1.2339	1.3752							1.3027
FAM3B	0.7677	6.1407														2.1712
FAS			1.4512	1.9135	0.967											1.3899	0.185159
FASLG	1.1074	1.8925														1.4476
FBXO32										0.07	0.2564	0.0608	10.2886	0.1096		0.2752	0.042372
FER								1.6784	2.0636							1.8611
FES								1.6812	0.2547							0.6543
FGF2			1.1378	1.4008	1.4767	1.1853	0.8718			0.5949	1.5177	0.5903	0.224	0.5336		0.8299	0.366189
FGF4															4.7572	4.7572
FGF9			3.0945	2.6485	1.5124											2.3143	0.04821
FGFR1			1.5021	0.8961	1.2202			1.8431	1.2105							1.2966	0.169105
FGFR2								0.8283	0.6461							0.7315
FGFR3								1.1233	1.105							1.1141
FGFR4								3.4554	0.1366							0.687
FGR								2.8168	0.443							1.117
FIGF	0.1561	0.3725														0.2411
FLNA						1.7224	0.233									0.6335
FLT1								0.7893	1.335							1.0265
FLT3								6.0056	2.1815							3.6196
FLT4								1.5381	0.263							0.6361
FOS			3.0231	3.9746	1.0868											2.3548	0.244588
FOXO1										0.431	1.0863	0.2681	0.1717	0.3844	1.0935	0.46	0.2132
FOXO3										0.9726	1.3674	0.1794	0.4116	0.1004	0.1469	0.34	0.1223
FRK								1.9931	2.0521							2.0224
FRS2			1.3734	2.2411	1.4479											1.6456	0.071989
FRS3			2.1883	0.1395	0.5306											0.5451	0.94029
FUS			1.9799	0.4716	0.6768											0.8582	0.995065
FYN								1.1781	0.4903							0.76
GALR1			11.2061	1.3295	2.349											3.271	0.291814
GALR2			10.5955	1.2252	1.8481											2.8842	0.318986
GDF2	0.3001	0.6069														0.4268
GDF5	0.0768	0.5598													2.195	0.46	0.7925
GDF9	0.0719	0.3068													0.54	0.23	0.0582
GDNF			0.0855	0.0495	0.5195	0.6875	0.1754								0.3073	0.21	0.0025
GFRA1			1.0494	0.77	1.1409											0.9733	0.891752
GFRA2			3.6613	2.4895	2.5018											2.8357	0.01087
GFRA3			3.2854	1.1592	2.1613											2.0191	0.254733
GMFB			1.4481	2.5264	1.7928											1.8718	0.097092
GMFG			6.1645	2.3099	1.3744											2.6948	0.199529
GPI						0.4051	0.5766									0.4833
GRIN1						0.8421	0.6714									0.7519
GRPR			0.8873	1.1169	1.8322											1.22	0.834491
GSK3A															0.3491	0.3491
GSK3B															0.66	0.66
HCK								1.7673	6.0415							3.2676
HCRT			10.5955	1.2252	1.8481											2.8842	0.318986
HDAC4						0.3785	0.2224									0.2902
HDAC5										0.6904	1.4922	0.6377	0.0002	0.3973		0.1491	0.345444
HES1						1.1018	0.7219									0.8918
HEY1						1.8242	1.8248									1.8245
HEY2						0.7196	0.7438									0.7316
HEYL						2.934	0.8103									1.5419
HK2										0.5388	0.2511	0.4488	0.0002	0.7012		0.1019	0.345059
HSPB1			0.2054	0.5336	0.5803										0.3861	0.4	0.0829
ICAM1															1.2	1.2
IFNA1	0.3001	0.6069														0.4268
IFNA2	0.3001	4.2413														1.1282
IFNA4	0.3001	0.6069														0.4268
IFNA5	0.1003	1.0765														0.3286
IFNB1	0.3001	0.9442														0.5323
IFNG	2.3214	1.3404													4.8563	2.47	0.0344
IGF1										3.6801	0.9229	0.9764	0.0545	3.2262		0.9437	0.452639
IGF1R								1.4059	0.3046							0.6544
IGF2										0.8511	0.8447	0.5769	0.0749	0.422		0.4418	0.224934
IGF2R								0.9846	0.5494							0.7354
IGFBP3										0.8611	0.7641	0.3157	0.0171	0.2509		0.2581	0.262206
IGFBP5										1.4192	3.7276	1.1952	0.5592	0.7123		1.2644	0.928923
IKBKB										0.4133	1.8303	0.4703	0.2607	0.284		0.5079	0.012782
IL10	0.6675	1.7533	5.7914	0.6697	1.0102										4.7572	1.6716	0.197722
IL10RA			17.5773	2.4165	2.3494										26.5125	7.17	0.0899
IL11	0.2623	0.6069														0.399
IL12A	1.0716	1.6245														1.3194
IL12B	0.3001	0.6069														0.4268
IL13	0.3001	0.5394														0.4023
IL15	0.3592	1.1951														0.6552
IL16	0.1494	1.4248														0.4613
IL17A	0.3001	0.6069														0.4268
IL17B	0.1583	0.9083														0.3791
IL17C	0.3001	0.6069														0.4268
IL18	1.0023	1.022														1.0121
IL19	0.3001	0.6069														0.4268
IL1A	0.3001	0.6069													4.7572	0.9533	0.531266
IL1B	0.1922	7.4342	1.5484	1.9722	0.8275					3.1475	0.4673	4.4452	2.5921	17.2	8.6117	2.77	0.3206
IL1R1			1.4955	1.376	1.3486											1.4052	0.044086
IL1RN	1.5288	52.9233														8.9948
IL2	0.3001	1.1338													5.8144	1.26	0.456
IL20	0.3001	0.6069														0.4268
IL21	0.3001	0.9987														0.5475
IL22	0.4448	1.379														0.7832
IL23A	0.2862	0.7577														0.4657
IL24	0.3001	1.0243														0.5544
IL25	0.3001	0.6069														0.4268
IL27	0.3001	0.6069														0.4268
IL3	0.3001	0.6069				0.1219	0.6379									0.3813	0.299156
IL4	0.3001	1.3853														0.6448
IL5	1.1038	0.5037														0.7456
IL6	0.5491	1.8449	6.9837	0.9369	0.8663					0.6939	0.6765	1.0937	0.1852	2.0059	4.2873	1.56	0.79
IL6R			0.3922	0.3242	0.4113										1.9082	0.56	0.7952
IL6ST			0.8558	1.848	1.2813											1.2654	0.349631
IL7	5.9661	2.3613													2.1172	3.1	0.0901
IL8	0.1239	2.1951													5.6746	1.16	0.5783
IL9	0.3001	0.4916														0.3841
INHA	0.1524	0.7934														0.3478
INHBA	1.8007	5.1087														3.033
INSR								0.6927	0.3509							0.493
INSRR								0.4134	0.948							0.626
ITK								11.1854	2.2716							5.0408
JAK1								1.3296	1.0351							1.1732
JAK2								1.4263	1.2854							1.3541
JAK3								0.9111	1.2407							1.0632
KDR								0.772	0.5275							0.6381
KIT								2.2069	1.7692							1.9759
LCK								3.875	0.922							1.8902
LEFTY2	3.4819	1.985														2.629
LEP										1.2431	2.0959	0.2619	0.2417	1.0476		0.7398	0.994812
LIF	0.1722	4.1955	0.8179	0.5412	0.9399											0.7863	0.221631
LIFR			0.8259	1.2925	0.9964											1.0208	0.894819
LMNA										1.11	2.3205	1.3392	0.8288	0.298		1.018	0.577208
LTA	0.3736	0.6069														0.4762
LTB	8.7299	4.9268														6.5582
LTK								0.7568	1.2656							0.9787
LYN								1.9724	1.4214							1.6744
MAGED1			2.2414	0.6834	0.9415											1.1298	0.58367
MAP2						0.8679	1.5723									1.1682
MAPK1										0.6214	1.3952	0.4081	0.5321	0.3689		0.6166	0.025927
MAPK14										0.7962	1.0596	0.6571	0.7861	0.3974		0.7402	0.172623
MAPK3										0.8208	2.7352	0.6787	0.4755	0.2287		0.7337	0.337198
MAPK8										0.6793	1.2234	0.4783	0.5454	0.6444		0.7091	0.003321
MATK								1.4016	2.3632							1.82
MB										0.0537	2.7701	0.1627	0.5406	0.8917		0.4316	0.705519
MC2R			10.5955	1.2252	1.8481											2.8842	0.318986
MDK						1.25	5.4873									2.619
MEF2C			0.6555	2.5585	1.8259	2.976	1.7462			0.8454	2.4665	0.2829	0.4497	0.6237		1.0466	0.679152
MERTK								1.4089	0.4308							0.7791
MET								3.0341	1.9267							2.4178
MIF															2.051	2.051
MLL						1.8727	0.5772									1.0397
MMP1															4.7572	4.7572
MMP2															2.4374	2.4374
MMP9										2.9807	0.2439	1.1114	0.2752	1.0223	5.3918	1.03	0.5152
MST1R								0.6631	0.8164							0.7358
MSTN	0.7366	2.3705								0.336	0.7145	0.1369	0.8954	1.5851		0.6989	0.233701
MT3			9.2976	1.0751	1.6217											2.5309	0.328435
MUSK								0.8442	0.1164	0.2826	1.0811	0.1396	0.2346	0.0769	0.0915	0.27	0.0279
MYC			3.4554	0.5457	0.7311											1.1129	0.580747
MYF5										0.0943	2.0868	0.2902	0.5589	0.2616	0.1885	0.27	0.299
MYF6										0.0598	0.8495	0.0457	0.2209	0.276		0.1786	0.050103
MYH1										0.1909	0.0767	0.0619	0.2016	0.1166		0.1222	0.093135
MYH2										0.0747	1.6034	0.1504	0.3831	0.3833		0.3207	0.018723
MYOD1										0.2677	1.4288	0.2043	0.6897	0.0876	0.3288	0.34	0.2565
MYOG										0.091	1.0068	0.0889	0.3933	0.1478		0.2273	0.030261
MYOT										0.0808	1.0602	0.0947	0.5042	0.8732		0.3406	0.042023
NDN						1.6297	1.3772									1.4981
NDP						7.2145	0.4977									1.8949
NEB										0.092	0.8976	0.0919	0.3889	0.1761		0.2316	0.000722
NELL1			12.5121	9.257	0.8466											4.6114	0.137355
NEUROD1						1.0993	0.6714									0.8591
NEUROG1						1.0993	0.6714									0.8591
NEUROG2						1.0993	0.6714									0.8591
NF1			1.1139	1.5137	1.368	1.4449	0.9073									1.1261	0.486614
NFKB1										0.7141	1.2586	0.7397	0.7631	0.6032		0.8295	0.575991
NGF			1.4215	0.2789	0.5274										0.6586	0.61	0.4749
NGFR			0.2368	0.086	0.1317										0.3577	0.18	0.0786
NGFRAP1			3.474	1.5441	1.2207											1.8708	0.203001
NODAL	0.3494	0.262													1.1022	0.47	0.1994
NOG						0.8744	0.6433									0.75
NOS2										0.3065	0.8847	0.1818	0.6392	2.1527		0.6137	0.436447
NOTCH1						0.6212	0.2488								1.9107	0.58	0.3008
NOTCH2						2.5227	2.9203								11.9449	5.5	0.152
NPFF			2.7088	0.5392	0.7128											1.0135	0.843351
NPFFR2			270.427	185.558	56.7321										87.9809	125.8	0.0177
NPY			3.6075	0.6193	2.8214											1.8473	0.508317
NPY1R			5.0992	4.7269	3.9096										4.8111	4.61	1e-05
NPY2R			89.9684	1.2252	2.1625											6.2003	0.365363
NR1I2			10.5955	1.2252	1.8481											2.8842	0.318986
NR2E3						0.4422	0.143									0.2514
NRCAM						0.3421	0.5429								0.3942	0.42	0.0724
NRG1			0.1284	0.2175	0.4345	0.3889	0.1852								0.4754	0.27	2e-06
NRG2			3.6844	0.6956	1.1282											1.4247	0.432552
NRG4			0.5888	0.2092	0.1918										1.1424	2.43	0.3875
NRP1						1.0944	0.8657									0.9733
NRP2						0.3039	0.3771									0.3385
NTF3			2.5709	1.0024	1.0824	0.9385	0.6375									1.1079	0.680587
NTF4			3.7819	0.7719	0.6597											1.2441	0.723905
NTN1						1.6815	0.4275									0.8479
NTRK1			10.5955	1.2252	1.8481	0.6631	1.2656								4.7572	2.72	0.1278
NTRK2			4.7221	2.6878	2.4807	4.0876	1.1309								6.5792	3.99	0.0073
NTRK3								1.1263	1.2248							1.1746
NTSR1			10.5955	1.2252	1.8481											2.8842	0.318986
ODZ1						1.4762	0.7356									1.0421
OLIG2						0.3328	0.0461								4.7572	0.42	0.2307
PAFAH1B1						0.7996	0.6412									0.716
PARD3						2.0518	0.5849									1.0955
PAX3						0.7404	0.391			0.1246	0.398	0.1405	0.5978	0.2277	0.2086	0.35	0.0644
PAX5						0.186	0.2956									0.2345
PAX6						91.3217	18.1121								116.797	57.81	0.2484
PAX7										0.1043	1.3199	0.2627	0.4408	0.1921	0.0858	0.21	0.0214
PDGFA	0.6887	0.8784														0.7778
PDGFRA								0.7289	1.3598							0.9956
PDGFRB								0.938	0.5632							0.7268
PDK4										0.6871	1.8141	0.0303	0.0775	0.107		0.2093	0.089931
PHOX2A															5.5542	5.5542
PHOX2B															4.7572	4.7572
PNOC			10.5955	1.2252	1.8481											2.8842	0.318986
POU3F3						3.1477	0.356									1.0586
POU4F1						0.9432	1.684									1.2603
PPARG										1.8772	1.2861	0.4561	0.22	1.1678		0.8166	0.901769
PPARGC1A										0.1058	0.405	0.0769	0.5158	0.5758		0.2629	0.004602
PPARGC1B										0.1127	0.5864	0.2313	0.2411	0.1015		0.2169	0.001386
PPP3CA										0.784	1.1565	1.0531	0.681	0.5928		0.8687	0.371564
PPYR1			6.7569	1.8068	0.722											2.0657	0.329868
PRKAA1										0.4985	1.2592	0.5042	0.5893	0.642		0.6876	0.566128
PRKAB2										0.1158	0.6981	0.1382	0.3441	0.3012		0.2719	0.002002
PRKAG1										0.4638	0.6896	0.3003	0.4521	0.4366	0.4746	0.46	0.0761
PRKAG3										0.2107	0.7418	0.0613	0.4824	0.2511		0.272	0.002847
PSPN			2.294	0.5484	0.4311											0.8155	0.90363
PTGER2			75.7775	14.4379	16.8624										53.9106	14.13	0.0978
PTK2								0.915	0.8242							0.8684
PTK2B								0.3683	1.482							0.7388
PTK6								0.4881	0.1555							0.2755
PTK7								2.4957	2.455							2.4753
PTN						1.4979	1.0201									1.2361
RAC1						0.8995	1.0438									0.969
RET								0.5158	5.3576							1.6624
RHOA										0.6698	0.9038	0.8782	0.6633	1.27		0.8951	0.788902
ROBO1						1.4883	0.9795									1.2074
ROR1								1.1661	2.6391							1.7543
ROR2								3.1541	1.2656							1.9979
ROS1								5.7377	8.4389							6.9585
RPS6KB1										0.3729	0.9666	0.3016	0.4201	0.8408		0.5477	0.442197
RTN4						1.1356	1.5168									1.3124
RYK								1.5645	1.156							1.3448
S100A6						1.8077	2.915									2.2955
S100B						0.1307	0.8256									0.3285
SERPINA3															0.1866	0.1866
SGCA										0.2179	1.1766	0.1609	0.3659	0.1096		0.292	0.058166
SHH						0.1232	0.3206									0.1987
SLC2A4										0.1012	0.3208	0.0872	0.3133	0.1572		0.178	0.001735
SLIT2						2.7605	1.9896								1.9608	2.21	0.0465
SOD1						1.0472	1.2444									1.1416
SOX2						0.2126	0.2337									0.2229
SOX8						0.2525	1.3345									0.5805
SPP1	0.0397	0.3137													1.3914	0.26	0.2091
SRC								1.479	0.458							0.823
SRMS								6.4787	0.8116							2.293
STAT1			1.3977	1.5864	1.0445											1.323	0.438763
STAT2			0.5173	0.6962	0.6416											0.6136	0.140834
STAT3			1.0415	0.7327	0.6349	0.8978	0.5893								1.2732	0.83	0.222
STAT4			7.8532	1.8449	2.0843											3.1141	0.212158
SYK								2.6943	1.0075							1.6476
TACR1			2.4814	2.958	1.591											2.2688	0.046129
TEC								1.2555	1.1604							1.207
TEK								0.7193	0.7322							0.7258
TFG			1.7947	1.6174	0.8851											1.3696	0.226704
TGFA	0.2082	2.4725	0.5155	0.3093	0.2383											0.4553	0.083761
TGFB1	0.8005	0.9883	1.6053	1.4881	1.2529	2.1701	0.4051			1.2394	2.8767	0.9539	0.6892	0.4071	0.7274	1.25	0.3972
TGFB2	1.1038	1.3444														1.2182
TGFB3	1.9155	1.4193														1.6488
TH						0.4268	0.7903									0.5808
THPO	1.0418	1.5281														1.2618
TIE1								0.8838	0.3587							0.563
TIMP1															11.3591	11.3591
TIMP2															2.6684	2.6684
TNF	0.7619	3.6821								1.6916	1.0108	4.2616	2.178	2.8018	4.7572	2.22	0.0131
TNFSF10	0.9955	1.4715														1.2103
TNFSF11	1.4886	2.4371														1.9047
TNFSF12	1.0994	0.5679														0.7902
TNFSF13	0.3814	0.7441														0.5328
TNFSF13B	1.4008	8.2389														3.3972
TNFSF14	0.0574	0.6069														0.1866
TNFSF4	0.3198	1.2918														0.6428
TNFSF8	2.3296	1.6148														1.9396
TNK1								0.6083	0.1095							0.2581
TNK2								0.4729	0.3878							0.4283
TNNC1										0.0717	2.053	0.1103	0.4511	0.6648		0.3624	0.130999
TNNI2										0.0702	0.3157	0.0684	0.3894	0.8245		0.2286	0.005219
TNNT1										0.0776	1.9002	0.1129	0.3084	0.6238		0.3332	0.907044
TNNT3										0.0807	0.3026	0.066	0.3191	0.3867		0.1911	0.001095
TNR						0.1554	0.6714									0.323
TP53			0.7874	0.4006	0.5496											0.5576	0.210328
TRIM63										0.0402	0.4324	0.0364	0.2597	0.1816		0.1308	0.001983
TRO			2.1014	1.204	1.0752											1.396	0.243293
TTN										0.0634	0.8756	0.0942	0.3072	0.2449		0.2191	0.001241
TXK								2.9409	0.6524							1.3852
TXLNA	0.5489	0.8946														0.7008
TYK2								1.5939	0.6338							1.0051
TYRO3								0.3468	0.5868							0.4511
UCN			1.6212	0.1566	0.5147											0.5075	0.611553
UTRN										1.1904	1.6379	0.8259	0.752	0.4918		0.9476	0.48098
VCAM1															7.483	7.483
VEGFA	0.3742	0.7796				0.4318	0.707								1.0132	0.62	0.0566
VGF			5.8849	0.6805	1.0265											1.6019	0.416599
YES1								1.3539	2.0051							1.6476
ZAP70								2.8966	0.2221							0.802
