# Supplementary material for: Expression of schizophrenia biomarkers in extraocular muscles from patients with strabismus: an explanation for the link between exotropia and schizophrenia?
Source: PeerJ. 2017 Dec 22;5:e4214. doi: 10.7717/peerj.4214 (PMC5742522; doi:10.7717/peerj.4214)
Supplement: Table S6 [file peerj-05-4214-s006.xlsx]

## Sheet: Sheet1
Strabismic lateral rectus (LR) vs. donor LR
Red Font	= gene has a p-value below or close to the adjusted p-value for this experiment.
	= gene is known to be expressed not only in skeletal muscle and/or tendon, but also in whole blood. We mention this out of an abundance of caution, because samples obtained from surgery tended to contain more blood than samples obtained from organ donors.
	Exp. 1 (Custom1)	Exp. 2 (Custom 1)	Exp. 3 (Custom 1)	Exp. 4 (Custom 1)
					Combined fold-change/donor
Gene						p-value
A2M	1.3831	1.2493	0.8227	1.9366	1.2881	0.224861
AKT1	1.2784	5.0239	1.6383	5.8865	2.8054	0.062289
AKT2	0.5548	1.1962	0.5349	1.8344	0.8983	0.496325
APOA1	0.839	1.2408	1.7711	0.7259	1.0756	0.786204
APOH	0.8674	2.4477	1.3655	5.4324	1.9921	0.13474
BDNF	4.0144	3.3105	2.6184	3.0089	3.1988	0.000961
BMP4	2.0309	4.1162	2.8412	2.3538	2.7344	0.029226
BMP8B	2.1887	2.8664	1.1744	1.0014	1.6481	0.433123
C3	1.77	1.2106	1.1856	1.1354	1.3032	0.415183
CCL16	3.2028	14.2578	4.8293	14.0475	7.4604	0.003023	chemokine - attracts lymphocytes
CNTF	0.6214	0.9398	0.324	2.0077	0.7851	0.470663
CNTFR	2.9085	14.1434	3.1691	13.4024	6.4652	0.000542
CNTN1	8.11	15.2622	15.9603	12.8885	12.6319	0.00491	contactin 1 - cell adhesion
CRP	0.4368	2.4477	2.7742	3.0398	1.7328	0.170936
CTGF	1.86	10.9894	4.6232	7.199	5.1071	0.004689
CXCR4	2.1083	1.7616	3.463	2.9649	2.485	0.049102	chemokine receptor - immune modulator/inflammation
DCX	4.3618	4.3204	32.023	7.622	8.2353	0.010925	doublecortin - microtubules, cytoskeleton
DDR2	4.244	4.4495	2.1701	5.046	3.7921	0.000588	collagen receptor, upregulates MMPs
EDN1	0.3809	1.5756	1.3756	0.5255	0.8116	0.510303
ERBB2	1.4321	4.7055	2.2511	6.5979	3.163	0.133039
FGF4	0.8674	2.4477	1.3655	5.4324	1.9921	0.13474
FOXO1	1.176	1.5477	1.0981	1.0747	1.2106	0.425668
FOXO3	0.5303	1.3569	0.3954	1.2661	0.7747	0.333853
GDF5	6.755	6.1566	2.3455	3.1395	4.1833	0.05166
GDF9	1.259	0.1861	0.57	0.5059	0.5098	0.180519
GDNF	0.0132	0.0902	0.0272	0.1967	0.0502	0.029201
GSK3A	0.7847	2.7512	1.2515	1.6416	1.4512	0.605884
GSK3B	1.2291	2.0824	1.4148	2.27	1.6932	0.022137	glycogen synthase kinase - multiple functions
HSPB1	0.3551	1.6168	0.4379	1.4609	0.7785	0.409785
ICAM1	3.0524	2.6018	1.6916	2.2559	2.3463	0.009534	cell adhesion
IFNG	1.3421	1.2092	0.1353	0.5792	0.5972	0.283743
IL1A	19.9882	15.9066	48.0523	43.1075	28.4875	0.003214
IL1B	19.5248	5.1111	35.2337	10.3362	13.8072	0.005604
IL2	0.8674	2.4477	1.3655	5.4324	1.9921	0.13474
IL6	0.6483	1.2707	50.0793	0.8947	2.4648	0.353683
IL6R	1.6221	3.6013	1.7383	2.5887	2.2643	0.078333
IL7	1.2534	1.6497	5.2919	1.2852	1.9365	0.165628
IL8	1.9216	1.1447	40.53	4.6786	4.5192	0.068308
IL10	1.2543	6.2671	10.3197	1.7526	3.453	0.184809
IL10RA	5.677	2.9602	2.168	3.794	3.4289	0.000925
MIF	1.3382	2.5416	1.9317	1.426	1.7495	0.024364	inflammatory cytokine
MMP1	0.2875	1.0905	0.6686	5.4324	1.033	0.916544
MMP2	5.4151	7.5385	3.8013	5.6424	5.4397	1.4e-05
MMP9	4.4221	4.5812	2.4164	9.2481	4.6127	0.022581
MUSK	0.2264	0.4306	0.1069	0.707	0.293	0.066623
MYF5	0.0078	0.0382	0.0146	0.0423	0.0207	0.000737	myogenic regulatory factor
MYOD1	0.0429	0.4413	0.1083	1.018	0.2137	0.110089
NGF	1.5747	4.4512	1.4629	14.2418	3.4763	0.014247
NGFR	0.666	0.9438	0.6865	0.6828	0.7368	0.49052
NODAL	0.2963	0.8522	0.2927	1.2301	0.5491	0.193083
NOTCH1	2.4694	6.973	2.3597	6.1576	3.9772	0.035409
NOTCH2	4.7997	5.4059	2.6641	8.1187	4.8672	0.001907	intercellular signaling - cell fate
NPFFR2	20.1955	18.6595	22.2651	18.0142	19.7174	0.003034	neuropeptide receptor (G=protein coupled receptor)
NPY1R	4.2999	8.8018	3.8929	6.3367	5.5277	0.000409
NRG1	0.4904	0.092	0.6174	0.1272	0.244	0.010607
NRG4	1.321	0.4711	1.0513	2.7643	1.1597	0.538501
NRCAM	0.2273	0.8686	0.172	2.7161	0.5511	0.44676
NTRK1	4.8229	7.2505	8.5926	6.8134	6.7265	0.000148
NTRK2	7.7592	8.2898	3.7252	5.3429	5.9817	0.001411
OLIG2	0.8674	2.4477	1.3655	5.4324	1.9921	0.13474
OSM	3.7896	2.4477	7.8762	6.8329	4.7268	0.008683	oncostatin M - inflammatory cytokine
PAX3	0.0923	0.6796	0.2081	0.473	0.2803	0.086464
PAX6	5.8401	4.5932	51.8407	21.8	13.1952	0.066025
PAX7	0.0111	0.066	0.0121	0.1253	0.0325	0.014824	myogenesis transcription factor
PHOX2A	0.4839	2.4477	1.5794	5.4324	1.7855	0.21431
PHOX2B	0.8674	2.4477	1.3655	5.4324	1.9921	0.13474
PRKAG1	0.7102	0.6357	0.8123	0.7633	0.7274	0.05931
PTGER2	53.5444	20.474	16.7106	26.3193	26.3509	6e-06	prostaglandin receptor - regulation of inflammation
SERPINA3	0.435	0.1521	0.5191	0.1057	0.2455	0.005237	plasma protease inhibitor
SLIT2	5.6629	4.6852	3.2178	4.7398	4.4851	0.01013	ligand of Robo receptor: cell migration
SPP1	0.6363	0.4816	0.0694	0.1741	0.2466	0.004008	osteopontin - extracellular matrix
STAT3	1.9785	2.5581	2.1398	1.8518	2.1162	0.019094	activator of transcription in response to cytokines and growth factors
TGFB1	1.8814	8.1745	2.8461	5.7424	3.9817	0.016445
TIMP1	7.7229	5.5482	9.1262	5.1122	6.6866	1e-06
TIMP2	7.9125	10.3132	4.784	6.3428	7.0541	0.002814
TNF	6.3585	5.7937	10.2164	11.0529	8.031	0.000719
VCAM1	1.4867	0.3602	0.7462	0.3509	0.6119	0.136824
VEGFA	0.4544	1.0032	0.5062	0.8631	0.668	0.100085
